# Supplementary material for: Transposable element insertions in fission yeast drive adaptation to environmental stress
Source: PubMed Central journal article supplement — Genome Res. 2019 Jan;29(1):85–95. doi: 10.1101/gr.239699.118 (PMC6314160; doi:10.1101/gr.239699.118), 2019-01
Supplement: supp_gr.239699.118_Supplemental_Fig_S1.pdf [file supp_gr.239699.118_Supplemental_Fig_S1.pdf]

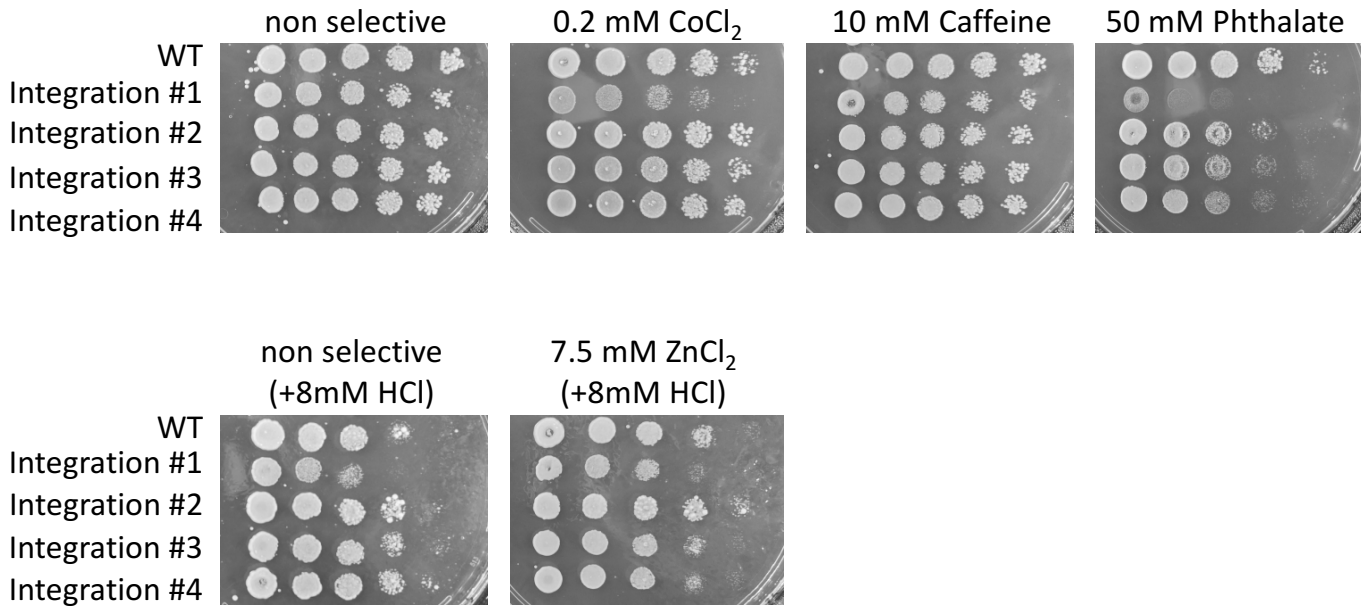

Supplemental Figure S1: Growth phenotype on solid media containing 0.2mM  $\text{CoCl}_2$ , 10mM Caffeine, 50mM Potassium Phthalate or 7.5mM  $\text{ZnCl}_2$  of cells containing Tfl integrations #1 through #4. Media containing  $\text{ZnCl}_2$  and the corresponding non selective media were supplemented with 8mM HCl to improve  $\text{ZnCl}_2$  solubility.
