# Supplementary material for: Transposable element insertions in fission yeast drive adaptation to environmental stress
Source: PubMed Central journal article supplement — Genome Res. 2019 Jan;29(1):85–95. doi: 10.1101/gr.239699.118 (PMC6314160; doi:10.1101/gr.239699.118), 2019-01
Supplement: supp_gr.239699.118_Supplemental_Fig_S2.pdf [file supp_gr.239699.118_Supplemental_Fig_S2.pdf]

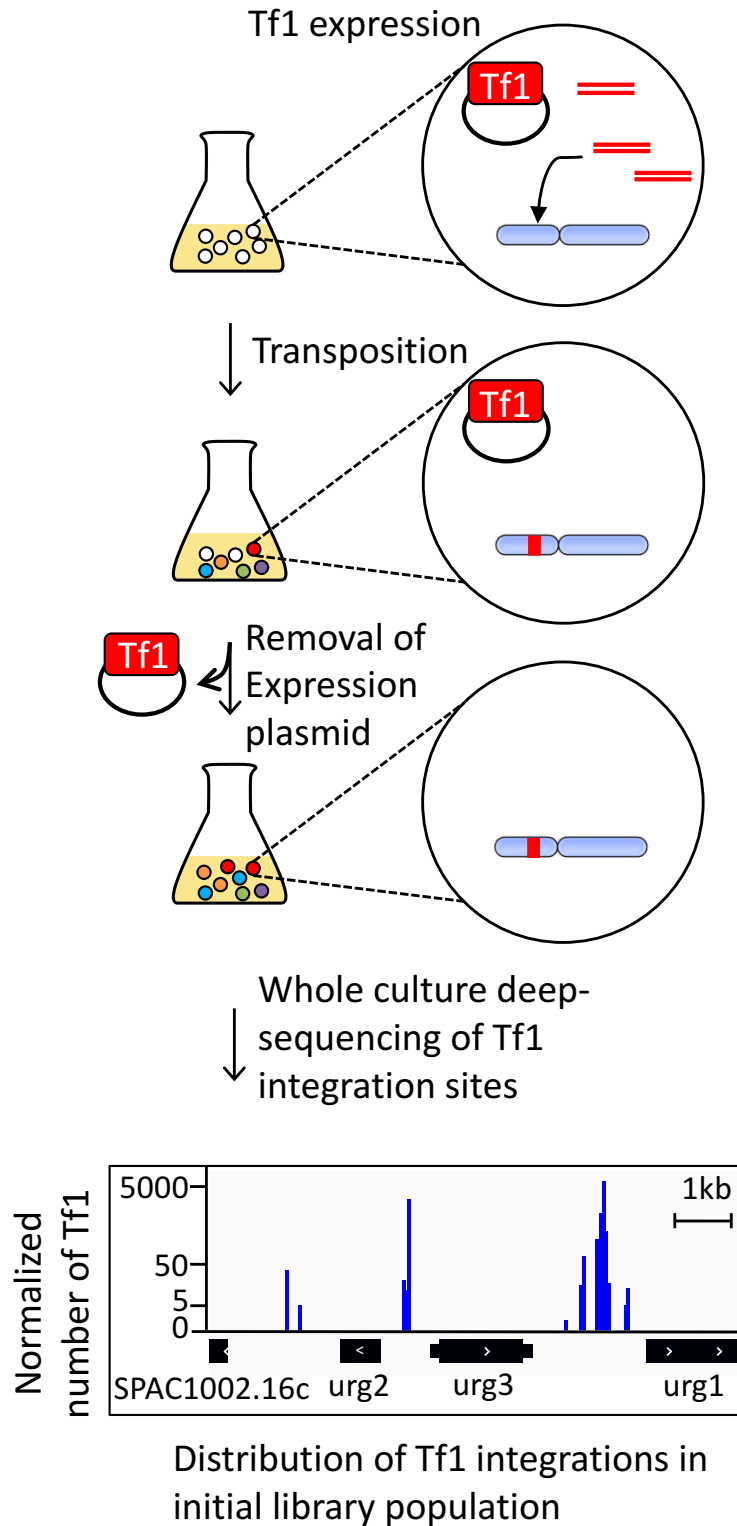

Supplementary Figure S1: Construction of Tf1 integration tag library. Transposition was induced in diploid cells from an expression plasmid. After the plasmid was removed, the resulting diverse library of  $1 \times 10^8$  cells with Tf1 integration tags was used for the  $\text{CoCl}_2$  passaging experiments. Genomic distribution of Tf1 integration in the library was characterized by sequencing the junction of the Tf1 tags with the genomic sequence.
