# Supplementary material for: Transposable element insertions in fission yeast drive adaptation to environmental stress
Source: PubMed Central journal article supplement — Genome Res. 2019 Jan;29(1):85–95. doi: 10.1101/gr.239699.118 (PMC6314160; doi:10.1101/gr.239699.118), 2019-01
Supplement: supp_gr.239699.118_Supplemental_Fig_S3.pdf [file supp_gr.239699.118_Supplemental_Fig_S3.pdf]

### Tf2s and Tf-LTRs in reference genome

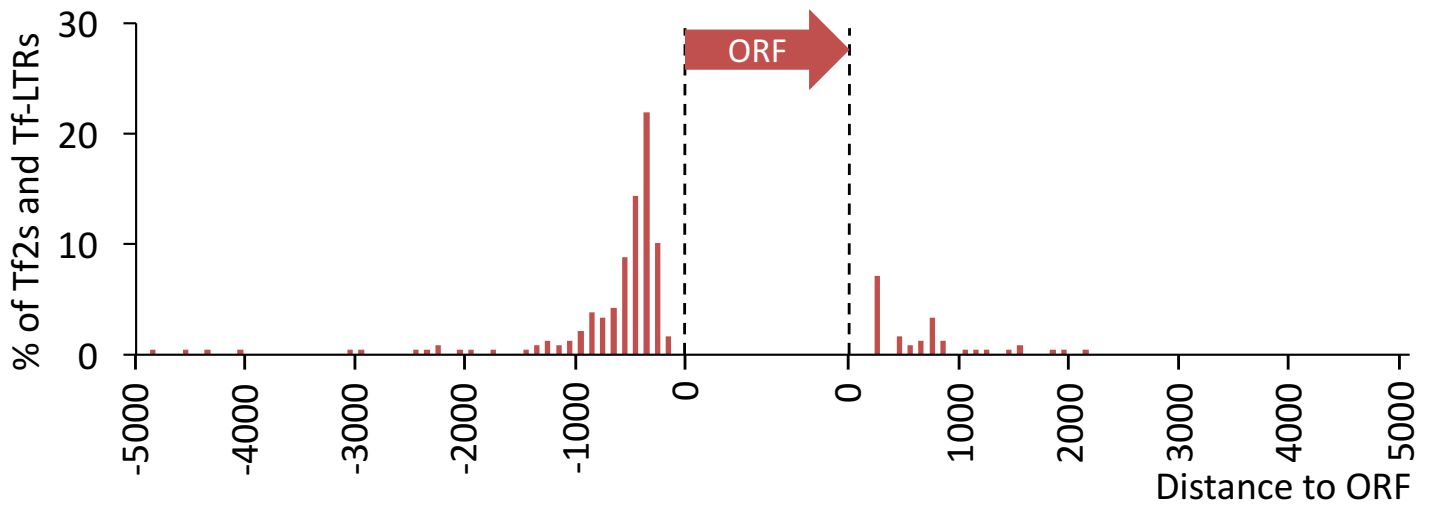

### Tf-type elements in wild strains

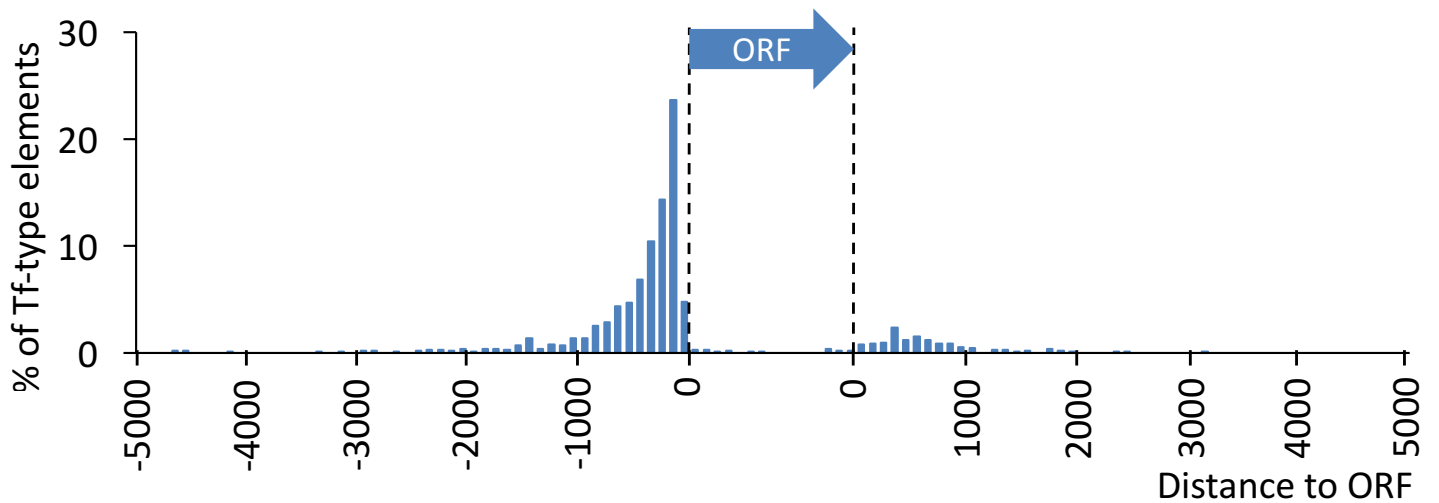

Supplementary Figure S2: Pre-existing Tf-type elements preferentially accumulate upstream of ORFs. Full length Tf2 and LTRs from Tf-type elements characterized in the reference genome (upper panel) and in 57 wild strains (lower panel) preferentially cluster upstream of ORFs, with little to no integration within ORFs.
