# Supplementary material for: Transposable element insertions in fission yeast drive adaptation to environmental stress
Source: PubMed Central journal article supplement — Genome Res. 2019 Jan;29(1):85–95. doi: 10.1101/gr.239699.118 (PMC6314160; doi:10.1101/gr.239699.118), 2019-01
Supplement: supp_gr.239699.118_Supplemental_Fig_S4.pdf [file supp_gr.239699.118_Supplemental_Fig_S4.pdf]

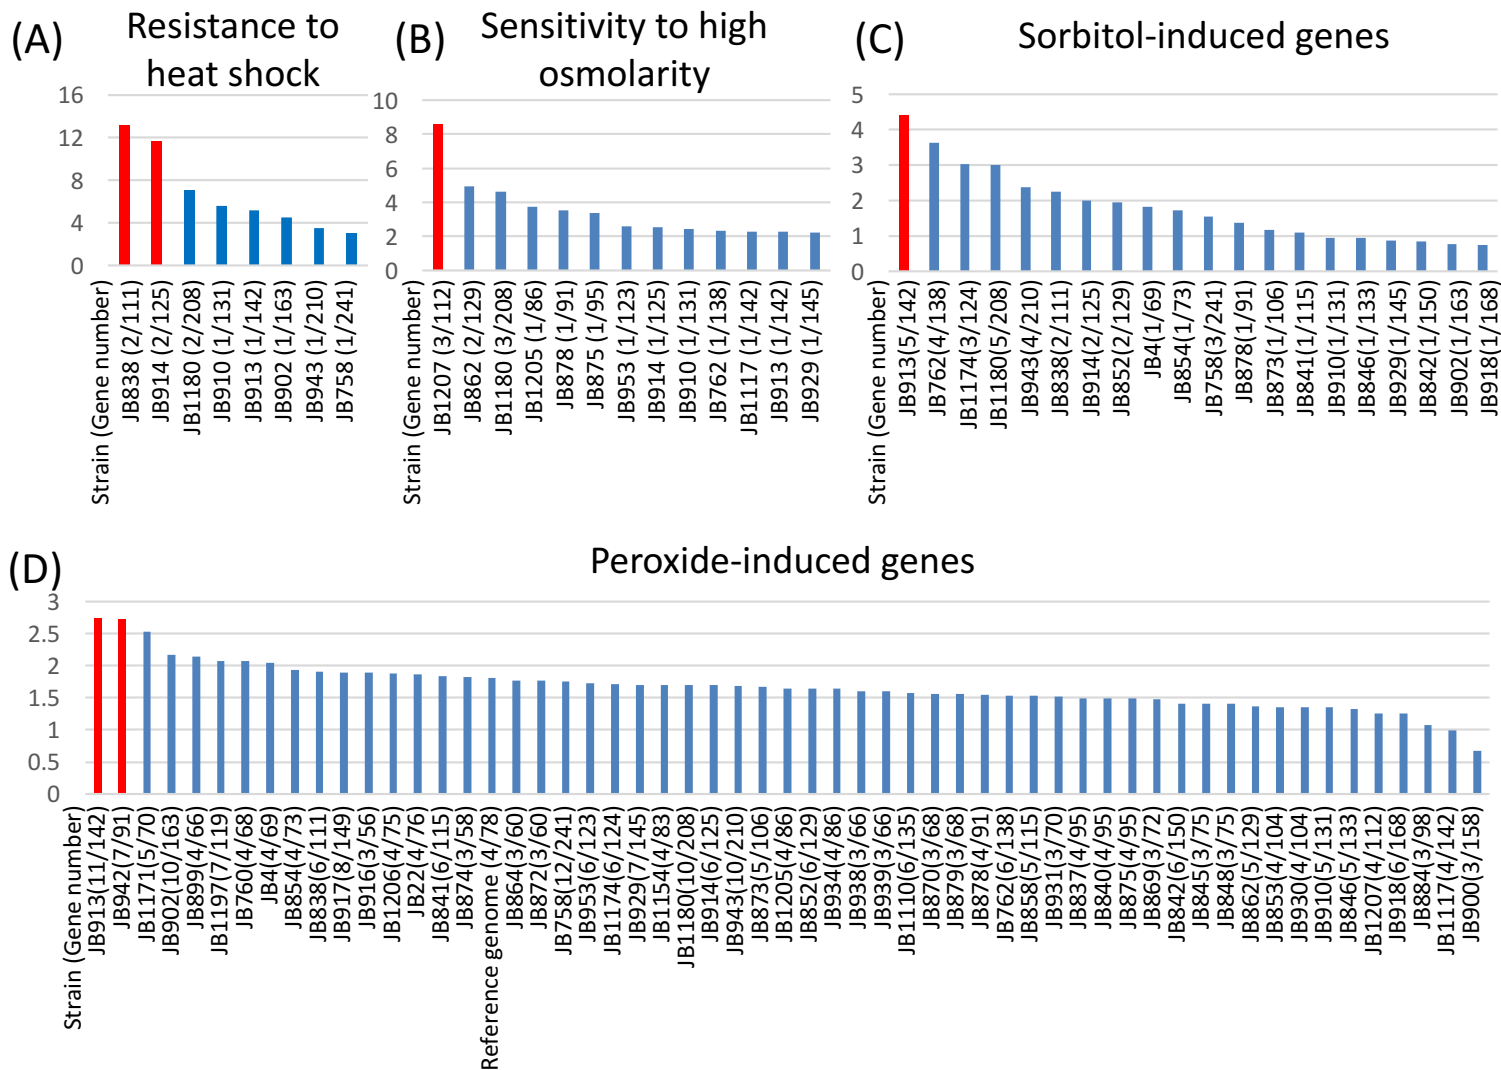

Supplementary Figure S3: Enrichment for terms related to environmental stress response of genes adjacent to polymorphic LTRs in wild strains. Enrichment analyses were performed against different sets of ontology annotation: **(A)** and **(B)** a subset of the Fission Yeast Phenotype Ontology annotation (Harris *et al.* 2013) limited to terms in resistance and sensitivity to environmental stresses; **(C)** and **(D)** set of genes induced by environmental stresses (Chen *et al.*, 2003). For each strain, the number of term genes among the number of genes adjacent to polymorphic LTRs are given in parenthesis. Significant enrichments (FDR-adjusted p-values) are indicated in red.
