# Supplementary material for: Transposable element insertions in fission yeast drive adaptation to environmental stress
Source: PubMed Central journal article supplement — Genome Res. 2019 Jan;29(1):85–95. doi: 10.1101/gr.239699.118 (PMC6314160; doi:10.1101/gr.239699.118), 2019-01
Supplement: supp_gr.239699.118_Supplemental_Fig_S5.pdf [file supp_gr.239699.118_Supplemental_Fig_S5.pdf]

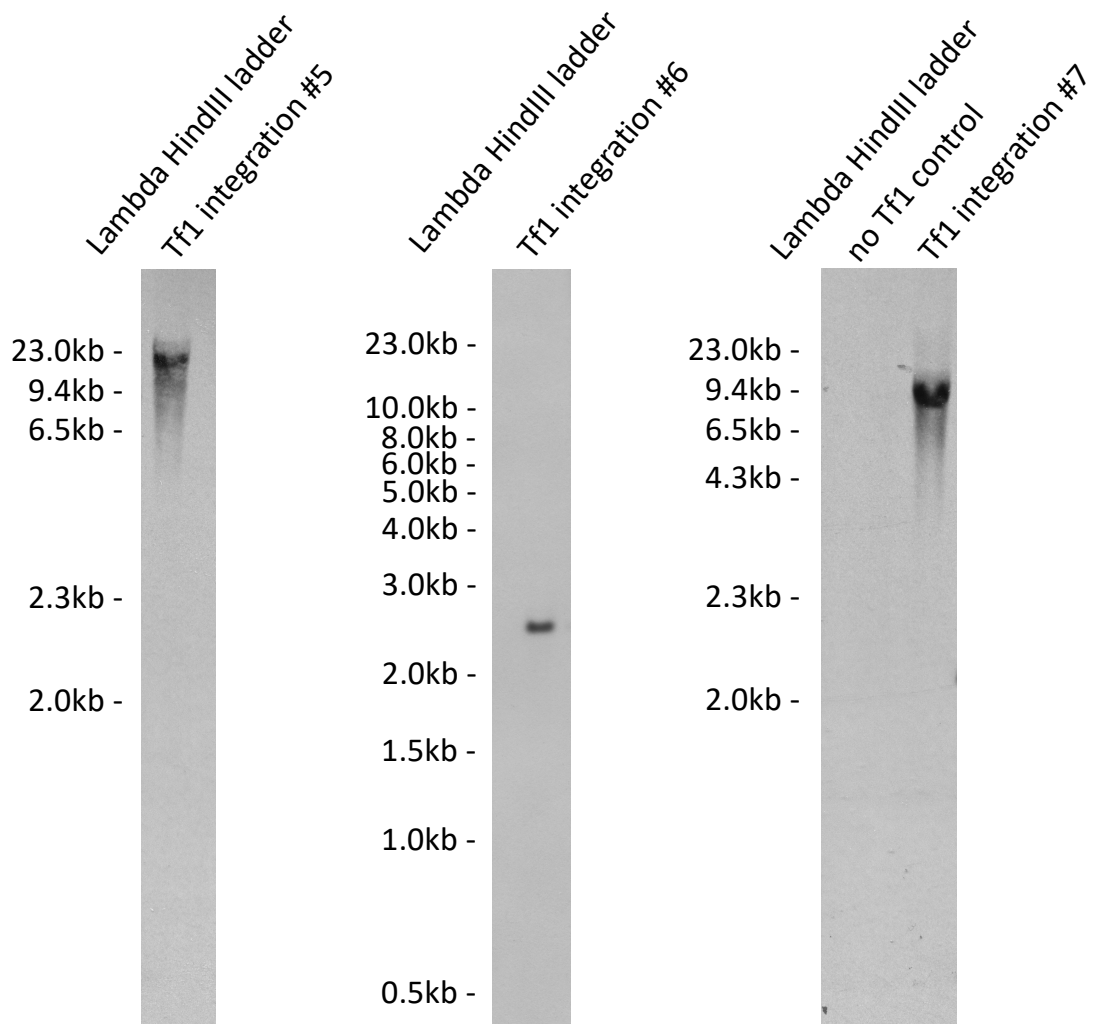

Supplemental Figure S5: Southern blot for the presence of Tf1-neo. The probe was located in the neo resistance gene of Tf1. Genomic DNA were digested with SphI for integrations #5 and #7, and with BstXI for integration #6. Expected sizes were 11.4kb for integration #5, 2.5kb for integration #6 and 8.7kb for integration #7.
