# Supplementary material for: Transposable element insertions in fission yeast drive adaptation to environmental stress
Source: PubMed Central journal article supplement — Genome Res. 2019 Jan;29(1):85–95. doi: 10.1101/gr.239699.118 (PMC6314160; doi:10.1101/gr.239699.118), 2019-01
Supplement: supp_gr.239699.118_Supplemental_Table_S2.pdf [file supp_gr.239699.118_Supplemental_Table_S2.pdf]

Supplemental Table S2: Function of genes adjacent to Tfl1 integration tags that expanded during passaging experiments in CoCl<sub>2</sub>.

| Biological function                                       | Gene IDs                                                                                                                                                                            |
|-----------------------------------------------------------|-------------------------------------------------------------------------------------------------------------------------------------------------------------------------------------|
| Amino acid transport <sup>1</sup>                         | any1, cat1, fnx2, isp7, npr2, pas1, put4, SPAC2E12.03c, SPCC777.04, tsc1                                                                                                            |
| Resistance to canavanine <sup>1</sup>                     | any1, cat1, gtr2, isp7, npr2, pas1, tsc1                                                                                                                                            |
| Cadmium-induced genes <sup>2</sup>                        | are1, ish1, isp7, mug147, pas1, ppr8, SPAC4H3.08, SPAPB24D3.08c, SPBC119.03, SPBPB2B2.08, SPCC63.13, tts1, zrt1                                                                     |
| H <sub>2</sub> O <sub>2</sub> -induced genes <sup>2</sup> | are1, bfr1, fmd2, ish1, mfs2, mug147, pas1, psp3, sfk1, SPAC1B3.06c, SPAC2E12.03c, SPAC4H3.08, SPAPB24D3.08c, SPBC119.03, SPBC1271.05c, SPCC24B10.20, SPCC63.13, Tf2-9, trr1, uvi15 |
| Genes regulated in tor1Δ <sup>3</sup>                     | hsp10, hsp90, isp7, mug147, pfl9, psp3, rcf2, SPAC1B3.06c, SPAC25B8.12c, SPAC4H3.08, SPAPB24D3.07c, SPAPB24D3.08c, SPBC119.03, SPBC18H10.05, SPBC8E4.04, SPCC285.04, wtf18          |

<sup>1</sup>: Gene Ontology (The Gene Ontology Consortium. Gene Ontology Consortium: going forward. (2015) Nucl Acids Res 43 Database issue D1049–D1056.) and FYPO Terms (Harris *et al.*, 2013): Amino acid transport (GO:0006865); TORC signaling (GO:0031929); Cation transport (GO:0006812); Resistance to canavanine (FYPO:0001029); Ergosterol biosynthetic process (GO:0006696); Response to sterol depletion (GO:0006991)

<sup>2</sup>: Chen *et al.*, 2003

<sup>3</sup>: Schonbrun *et al.*, 2009

Chen, D. R., W. M. Toone, J. Mata, R. Lyne, G. Burns, K. Kivinen, A. Brazma, N. Jones, and J. Bahler. Global transcriptional responses of fission yeast to environmental stress. *Molecular Biology of the Cell*, 2003; 14: 214-29.

Harris MA, Lock A, Bähler J, Oliver SG, Wood V. FYPO: The Fission Yeast Phenotype Ontology. *Bioinformatics*. 2013 July 1;29(13): 1671–1678.

Schonbrun, M., Laor, D., Lopez-Maury, L., Bahler, J., Kupiec, M., & Weisman, R. TOR complex 2 controls gene silencing, telomere length maintenance, and survival under DNA-damaging conditions. *Mol. Cell Biol.*, 2009; 29(16), 4584-4594.
