# Supplementary material for: Transposable element insertions in fission yeast drive adaptation to environmental stress
Source: PubMed Central journal article supplement — Genome Res. 2019 Jan;29(1):85–95. doi: 10.1101/gr.239699.118 (PMC6314160; doi:10.1101/gr.239699.118), 2019-01
Supplement: supp_gr.239699.118_Supplemental_Table_S3.pdf [file supp_gr.239699.118_Supplemental_Table_S3.pdf]

Supplemental Table S3: Reference number and description of yeast strains used in this study.

| Strain #  | Derived from | Description / Phenotype                                                                                            | Mating type       | Source or reference                                             |
|-----------|--------------|--------------------------------------------------------------------------------------------------------------------|-------------------|-----------------------------------------------------------------|
| YHL9632   |              | Tf1-neo Integration (in the intergenic region <i>ssa1-upf3</i> ), <i>ura4-D18 leu1-32 ade6-M210</i>                | h+                | Feng et al, <i>Nucleic Acids Res</i> 41, 775-789 (2013)         |
| YHL9631   |              | Tf1-neo Integration (in the intergenic region SPAC19A8.06- <i>sst4</i> ), <i>ura4-D18 leu1-32 ade6-M210</i>        | h+                | Feng et al, <i>Nucleic Acids Res</i> 41, 775-789 (2013)         |
| YHL9629   |              | Tf1-neo Integration (in the intergenic region SPAC24B11.08c- <i>mpc2</i> ), <i>ura4-D18 leu1-32 ade6-M210</i>      | h+                | Feng et al, <i>Nucleic Acids Res</i> 41, 775-789 (2013)         |
| YHL9638   |              | Tf1-neo Integration (in the intergenic region <i>sim4-rpl1001</i> ), <i>ura4-D18 leu1-32 ade6-M210</i>             | h+                | Feng et al, <i>Nucleic Acids Res</i> 41, 775-789 (2013)         |
| YHL10157  | YHL9632      | Tf1-neoAI Integration #1 (in the intergenic region <i>ssa1-upf3</i> ), <i>ura4-D18 leu1-32 ade6-M210</i>           | h+                | This study                                                      |
| YHL10277  | YHL9631      | Tf1-neoAI Integration #2 (in the intergenic region SPAC19A8.06- <i>sst4</i> ), <i>ura4-D18 leu1-32 ade6-M210</i>   | h+                | This study                                                      |
| YHL11123  | YHL9629      | Tf1-neoAI Integration #3 (in the intergenic region SPAC24B11.08c- <i>mpc2</i> ), <i>ura4-D18 leu1-32 ade6-M210</i> | h+                | This study                                                      |
| YHL11124  | YHL9638      | Tf1-neoAI Integration #4 (in the intergenic region <i>sim4-rpl1001</i> ), <i>ura4-D18 leu1-32 ade6-M210</i>        | h+                | This study                                                      |
| YHL5661   |              | WT diploid lacking Tf1, <i>ura4-D18/ura4-D18 leu1-32/leu1-32 ade6-M210/ade6-M216</i>                               | stable diploid h+ | Chatterjee et al, <i>Nucleic Acids Res</i> 42, 8449-8460 (2014) |
| YHL1605   |              | WT haploid lacking Tf1, <i>ura4-D18/ura4-D18 leu1-32/leu1-32 ade6-M210/ade6-M216</i>                               | h+                | This study                                                      |
| YHL11396  | YHL1605      | Tf1-neo Integration #7 at Chr. II 3858489 (+) ( <i>sat1-ssn6</i> intergenic region)                                | h+                | This study                                                      |
| YHL11450  |              | Tf1-neo Integration #5 at Chr. II 3607268 (-) ( <i>mok13-zrt1</i> intergenic region)                               | h+                | This study                                                      |
| YHL11550  |              | Tf1-neo Integration #6 at Chr. I 678437 (-) ( <i>tsc1-rgs1</i> intergenic region)                                  | h+                | This study                                                      |
| V2-33-H11 |              | WT H11 <i>ade6-210</i> of same background than Bioneer deletions                                                   | h+                | Bioneer                                                         |
| V2-33-H12 |              | WT H12 <i>ade6-216</i> of same background than Bioneer deletions                                                   | h+                | Bioneer                                                         |
| V2-23-H05 |              | deletion of the GTPase <i>Ryh1</i>                                                                                 | h+                | Bioneer                                                         |
| V2-12-G08 |              | deletion of the phosphatidylinositol kinase <i>Tor1</i>                                                            | h+                | Bioneer                                                         |
| V2-14-H10 |              | deletion of the stress activated MAP kinase interacting protein <i>Sin1</i>                                        | h+                | Bioneer                                                         |
| V2-22-H06 |              | deletion of the hamartin <i>Tsc1</i>                                                                               | h+                | Bioneer                                                         |
| V2-12-G04 |              | deletion of the tuberlin <i>Tsc2</i>                                                                               | h+                | Bioneer                                                         |
| V2-21-H09 |              | deletion of the TORC1 subunit <i>Tco89</i>                                                                         | h+                | Bioneer                                                         |
| YBN174    |              | deletion of <i>gtr1</i>                                                                                            | h+                | Bioneer                                                         |
| V2-05-B11 |              | deletion of <i>npr2</i>                                                                                            | h+                | Bioneer                                                         |
| V2-07-G09 |              | deletion of <i>sat1</i>                                                                                            |                   |                                                                 |
