# Supplementary material for: Transposable element insertions in fission yeast drive adaptation to environmental stress
Source: PubMed Central journal article supplement — Genome Res. 2019 Jan;29(1):85–95. doi: 10.1101/gr.239699.118 (PMC6314160; doi:10.1101/gr.239699.118), 2019-01
Supplement: supp_gr.239699.118_Supplemental_Table_S4.pdf [file supp_gr.239699.118_Supplemental_Table_S4.pdf]

Supplemental Table S4: Reference number and description of plasmids used in this study.

| Strain # | Derived from      | Description                                                                                                                                                                              | Source or reference                                            |
|----------|-------------------|------------------------------------------------------------------------------------------------------------------------------------------------------------------------------------------|----------------------------------------------------------------|
| pHL414-2 |                   | contains full length Tf1- <i>neo</i>                                                                                                                                                     | Levin et al., EMBO Journal vol. 12 no. 12 pp.4885 - 4895, 1993 |
| pHL692   |                   | contains the fragment <i>neo</i> -AI that can be excised with BamHI from pNG54                                                                                                           | D. Voytas                                                      |
| pHL1288  |                   | empty plasmid, contains leu selective marker                                                                                                                                             | Balasundaram et al., Mol. Cell. Biol. 1999, 19(8):5768         |
| pHL2944  |                   | plasmid library containing Tf1- <i>neo</i> tagged with Serial Number, under nmt1 promoter                                                                                                | Chatterjee et al., Nucleic Acids Res. 2014 Jul;42(13):8449-60  |
| pHL2976  |                   | contains upstream and downstream sections of Tf1- <i>neo</i> flanked by 500bp upstream and downstream of the integration site at Chr. II 3607268 (-) in the intergenic region mok13-zrt1 | This study                                                     |
| pHL2978  | pHL2976; pHL414-2 | contains the full length of Tf1- <i>neo</i> flanked by 500bp sections of the integration site at Chr. II 3607268 (-) in the intergenic region mok13-zrt1                                 | This study                                                     |
| pHL3010  |                   | contains upstream and downstream sections of Tf1- <i>neo</i> flanked by 500bp upstream and downstream of the integration site at Chr.I 678437 (-) in the intergenic region tsc1-rgs1     | This study                                                     |
| pHL3019  | pHL3010; pHL414-2 | contains the full length of Tf1- <i>neo</i> flanked by 500bp sections of the integration site at Chr.I 678437 (-) in the intergenic region tsc1-rgs1                                     | This study                                                     |
