# Supplementary material for: Transposable element insertions in fission yeast drive adaptation to environmental stress
Source: PubMed Central journal article supplement — Genome Res. 2019 Jan;29(1):85–95. doi: 10.1101/gr.239699.118 (PMC6314160; doi:10.1101/gr.239699.118), 2019-01
Supplement: supp_gr.239699.118_Supplemental_Table_S5.pdf [file supp_gr.239699.118_Supplemental_Table_S5.pdf]

Supplemental Table S5: Reference number, sequence and description of oligonucleotides used in this study.

| Primer Name | Sequence                                                                                                    | Description                                                                                            |
|-------------|-------------------------------------------------------------------------------------------------------------|--------------------------------------------------------------------------------------------------------|
| HL3510      | CCTGATTGCCGACATTATC                                                                                         | Amplification of fragment containing Artificial Intron for homologous recombination - Forward          |
| HL3511      | ATTC AACGGAAACGTCTTG                                                                                        | Amplification of fragment containing Artificial Intron for homologous recombination - Reverse          |
| HL1870      | GTAATACGACTCACTATAGGGCTCCGCTTAAGGGAC                                                                        | Linker for Illumina sequencing - Forward                                                               |
| HL1871      | P- TAGTCCCTTAAGCGGAG-3AmMO                                                                                  | Linker for Illumina sequencing - Reverse                                                               |
| HL2216      | CAAGCAGAAGACGGCATAACGAGCTTCCGATCTGTAATACGACTCACTATAGGGC                                                     | Linker-specific primer for Illumina sequencing - Reverse                                               |
| HL3498      | AATGATACGGCGACCACCGAGATCTACACTCTTCCCTACACGACGCTCTCCGATCTA<br>CGTCTCACCGCAGTTGATGCATAGGAAGC                  | Tf1-specific primer for Illumina sequencing - Forward barcode #1                                       |
| HL3512      | AATGATACGGCGACCACCGAGATCTACACTCTTCCCTACACGACGCTCTCCGATCTT<br>gcaCTCACCGCAGTTGATGCATAGGAAGC                  | Tf1-specific primer for Illumina sequencing - Forward barcode #2                                       |
| HL3513      | AATGATACGGCGACCACCGAGATCTACACTCTTCCCTACACGACGCTCTCCGATCTT<br>tacCTCACCGCAGTTGATGCATAGGAAGC                  | Tf1-specific primer for Illumina sequencing - Forward barcode #3                                       |
| HL3514      | AATGATACGGCGACCACCGAGATCTACACTCTTCCCTACACGACGCTCTCCGATCTT<br>atgCTCACCGCAGTTGATGCATAGGAAGC                  | Tf1-specific primer for Illumina sequencing - Forward barcode #4                                       |
| HL2461      | CCATTGACACGGATTGTTC                                                                                         | qRT-PCR act1 - Forward                                                                                 |
| HL2462      | GAGCCTCAGTCAACAAGCAA                                                                                        | qRT-PCR act1 - Reverse                                                                                 |
| HL2719      | ATGGTGGATATTGTACTCAAGATG                                                                                    | qRT-PCR Tf1 - Forward                                                                                  |
| HL2720      | CCATGCCTTTCTATACGTTTC                                                                                       | qRT-PCR Tf1 - Reverse                                                                                  |
| HL3689      | CTCTGAACGGGATGATTGG                                                                                         | qRT-PCR sat1 - Forward                                                                                 |
| HL3690      | GAGTCAGTAGCACTGGAATG                                                                                        | qRT-PCR sat1 - Reverse                                                                                 |
| HL3680      | CTTCGACGGAGCCATAAAG                                                                                         | qRT-PCR ssn6 - Forward                                                                                 |
| HL3681      | CCGAAGTCACTGTGCAGAA                                                                                         | qRT-PCR ssn6 - Reverse                                                                                 |
| HL4037      | TGCTCAGAAGCTGGAAAGA                                                                                         | qRT-PCR wee1 - Forward                                                                                 |
| HL4038      | AAGGAGAGAAGAGCCCGAT                                                                                         | qRT-PCR wee1 - Reverse                                                                                 |
| HL3684      | CTGGTTCTTGTACCCGGGA                                                                                         | qRT-PCR SPCC18B5.02c - Forward                                                                         |
| HL3685      | TTGCTTTTTCATGCTCTT                                                                                          | qRT-PCR SPCC18B5.02c - Reverse                                                                         |
| HL3775      | AGGCTGAAAAGCTCACTAGA                                                                                        | qRT-PCR mok13 - Forward                                                                                |
| HL3776      | CAGAATGGTGATCGAGGATGG                                                                                       | qRT-PCR mok13 - Reverse                                                                                |
| HL3777      | TGGCGTTATCTATTCGTTGG                                                                                        | qRT-PCR zrt1 - Forward                                                                                 |
| HL3778      | AGCATAAGACCCATGAGCAAG                                                                                       | qRT-PCR zrt1 - Reverse                                                                                 |
| HL4344      | TGTGCGGTTCAAAGAGGT                                                                                          | qRT-PCR any1 - Forward                                                                                 |
| HL4345      | GAAGCGAACCGGGAAGAAAGC                                                                                       | qRT-PCR any1 - Reverse                                                                                 |
| HL4346      | ACCCCGGATTGTTGACGA                                                                                          | qRT-PCR cat1 - Forward                                                                                 |
| HL4347      | CCATCTCTCCCGTTGCCCT                                                                                         | qRT-PCR cat1 - Reverse                                                                                 |
| HL4348      | TGCTTTGAAATCTCGGCACG                                                                                        | qRT-PCR put4 - Forward                                                                                 |
| HL4349      | TCTGAAAGCGCAGAACCAGA                                                                                        | qRT-PCR put4 - Reverse                                                                                 |
| HL4354      | TGCCAATTTGTACGAATGCC                                                                                        | qRT-PCR tsc1 - Forward                                                                                 |
| HL4355      | TCAAATCGGGATAGCCTCCG                                                                                        | qRT-PCR tsc1 - Reverse                                                                                 |
| HL4356      | TCCGGCGATAAAGCTCAACA                                                                                        | qRT-PCR rgs1 - Forward                                                                                 |
| HL4357      | CATCGTCGAGAAGAGCTCCA                                                                                        | qRT-PCR rgs1 - Reverse                                                                                 |
| HL3701      | T*C*C*ATTTTGAAAATCAATCCATACCGCACCGTCTCTCTCGTACTCCCTCATT<br>GTGCAGTAAAGTGGGAGCCACGAAAATGTGAGCAATACTACACTACGC | Fusion PCR part 1 of Tf1 from plasmid, with 80bp of sat1-ssn6 target site for homologous recombination |
| HL3702      | AGTTGGATTTCTCTCCACACG                                                                                       | Fusion PCR part 1 of Tf1 from plasmid, with 80bp of sat1-ssn6 target site for homologous recombination |
| HL3703      | ACGAATCCGAGCCTGAAAAC<br>T*T*A*TCTTAAAATAAGCGACATTTCAATCATCCATCGTTCTTCTCTCTCT                                | Fusion PCR part 2 of Tf1 from plasmid, with 80bp of sat1-ssn6 target site for homologous recombination |
| HL3704      | CACAAACAATCGTTATATCCTTTTTCTGTTAGCTACGCAGTTTGG                                                               | Fusion PCR part 2 of Tf1 from plasmid, with 80bp of sat1-ssn6 target site for homologous recombination |
| HL3710      | T*C*C*ATTTTGAAAATCAATCCATACCGCAC                                                                            | Fusion PCR part 3 of Tf1 from plasmid, with 80bp of sat1-ssn6 target site for homologous recombination |
| HL3711      | T*T*A*TCTTAAAATAAGCGACATTTCAATCA                                                                            | Fusion PCR part 3 of Tf1 from plasmid, with 80bp of sat1-ssn6 target site for homologous recombination |
| HL4023      | AACGCTGGAGGTAGGAGGAA                                                                                        | Amplification of a probe near sat1 for Southern blot                                                   |
| HL4024      | CCACATGGGACAGGTATCTA                                                                                        | Amplification of a probe near sat1 for Southern blot                                                   |
| HL4025      | CACGAACGTCTGAGGGTGAA                                                                                        | Amplification of a probe near wee1 for Southern blot                                                   |
| HL4026      | CGGCTCAGTGTCCACAATA                                                                                         | Amplification of a probe near wee1 for Southern blot                                                   |
| HL4027      | AGTGCTCCCTACAAGATGC                                                                                         | Amplification of a probe near zrt1 for Southern blot                                                   |
| HL4028      | GGACGAAAAGTCGCTTACCCA                                                                                       | Amplification of a probe near zrt1 for Southern blot                                                   |

\* indicates a Phosphorothioate Bond modification
